# Supplementary material for: Carboxyl-Alkyl Functionalized Conjugated Polyelectrolytes for High Performance Organic Electrochemical Transistors
Source: PubMed Central journal article supplement — Chem Mater. 2023 Nov 2;35(21):9299–312. doi: 10.1021/acs.chemmater.3c02103 (PMC10653087; doi:10.1021/acs.chemmater.3c02103), 2023-11-02
Supplement: cm3c02103_si_001.pdf [file cm3c02103_si_001.pdf]

Supporting information:

**Carboxyl-Alkyl Functionalized Conjugated Polyelectrolytes for High Performance Organic Electrochemical Transistors**

Zeyuan Sun<sup>1</sup>, Brian Khau<sup>2#</sup>, Hao Dong<sup>1</sup>, Christopher J Takacs<sup>3</sup>, Shuhan Yuan<sup>4</sup>, Mengting Sun<sup>1</sup>, Bar Mosevitzky Lis<sup>1</sup>, Dang Nguyen<sup>1</sup>, Elsa Reichmanis<sup>1,\*</sup>

<sup>1</sup>Department of Chemical and Biomolecular Engineering, Lehigh University, Bethlehem, PA, 18015, USA

<sup>2</sup>School of Chemical and Biomolecular Engineering, Georgia Institute of Technology, Atlanta, GA 30332, United States

<sup>3</sup>Stanford Synchrotron Radiation Lightsource SLAC National Accelerator Laboratory, Menlo Park, CA 94025, United States

<sup>4</sup>Department of Applied Health Science, School of Public Health, Indiana University, Bloomington, IN 47405, United States

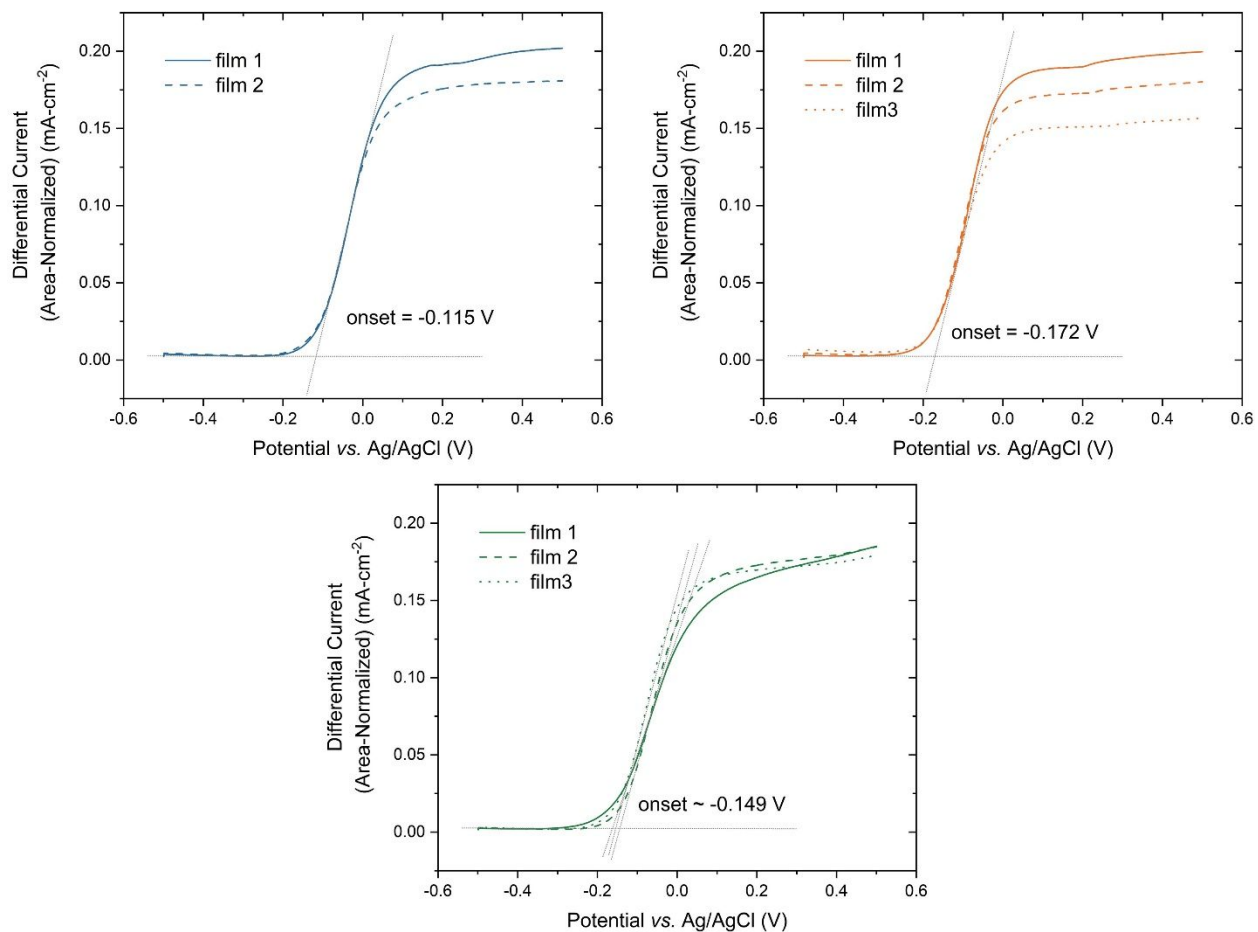

**Figure S1:** Differential Pulse Voltammetry (DPV) for P3C(Pr)T (blue), P3C(Bu)T (orange), and P3C(Pe)T (green), in 0.1 M NaCl in H<sub>2</sub>O. The measured onset is vs. the Ag/AgCl reference.

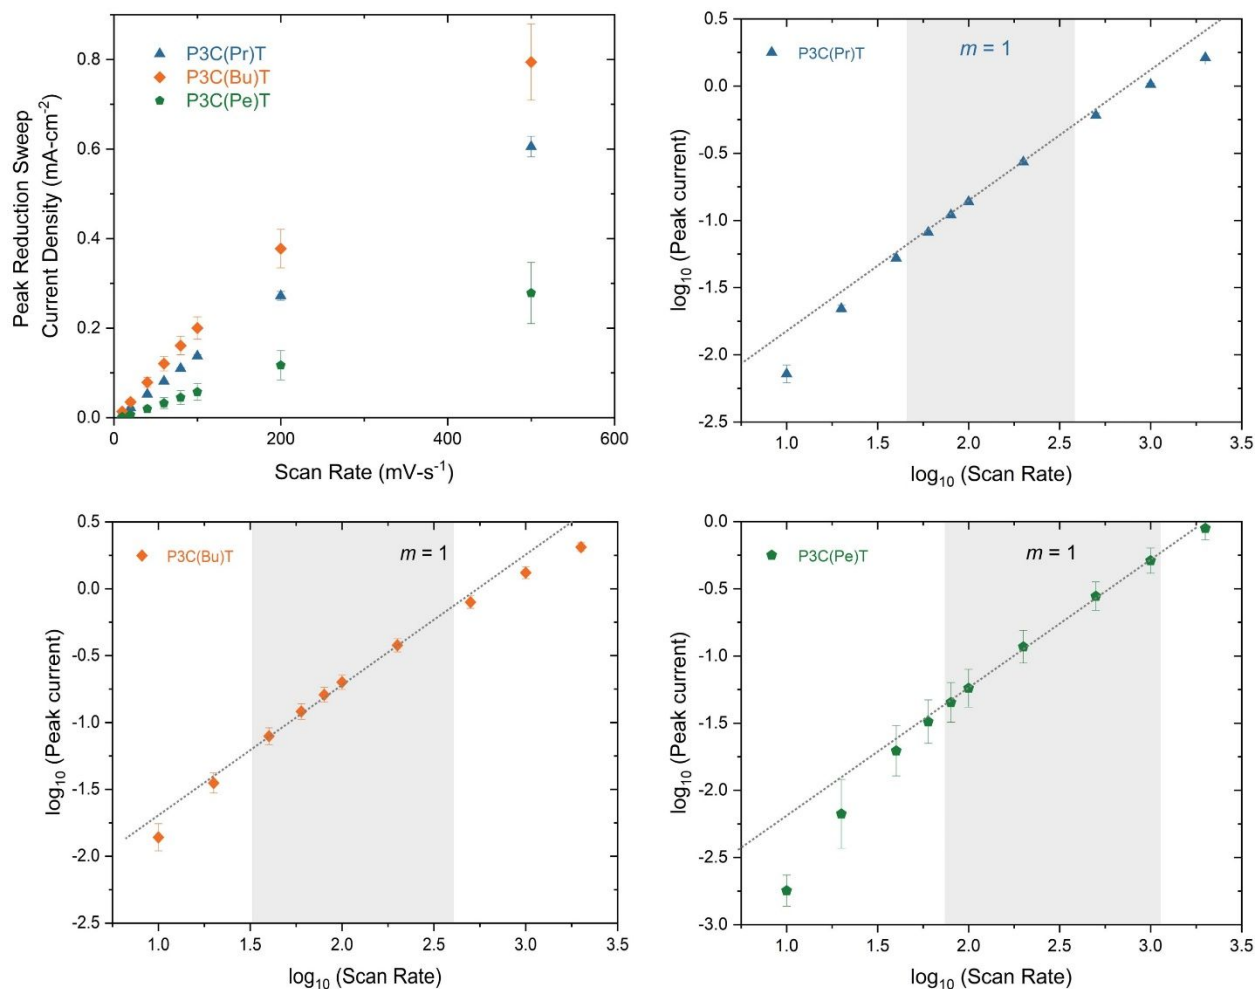

**Figure S2:** Top left: Linear graph of peak reduction current density as a function of scan rate. Top right; bottom left; bottom right: log-log plots for peak density vs scan rate for P3C(Pr)T (blue), P3C(Bu)T (orange), and P3C(Pe)T (green), in 0.1 M NaCl (aq) to analyze power scaling for mass transfer limitations.

**Table S1:** Approximate regimes cutoffs for the polymers tested in this study

| Polymers | Superlinear<br>(Diffusion-limited) | Linear<br>(Adsorption-limited) | Square-Root<br>(Mass transfer limited) |
|----------|------------------------------------|--------------------------------|----------------------------------------|
| P3C(Pr)T | < 50 mV-s <sup>-1</sup>            | 50-500 mV-s <sup>-1</sup>      | > 500 mV-s <sup>-1</sup>               |
| P3C(Bu)T | < 50 mV-s <sup>-1</sup>            | 50-300 mV-s <sup>-1</sup>      | > 300 mV-s <sup>-1</sup>               |
| P3C(Pe)T | < 100 mV-s <sup>-1</sup>           | 100-1000 mV-s <sup>-1</sup>    | > 1000 mV-s <sup>-1</sup>              |

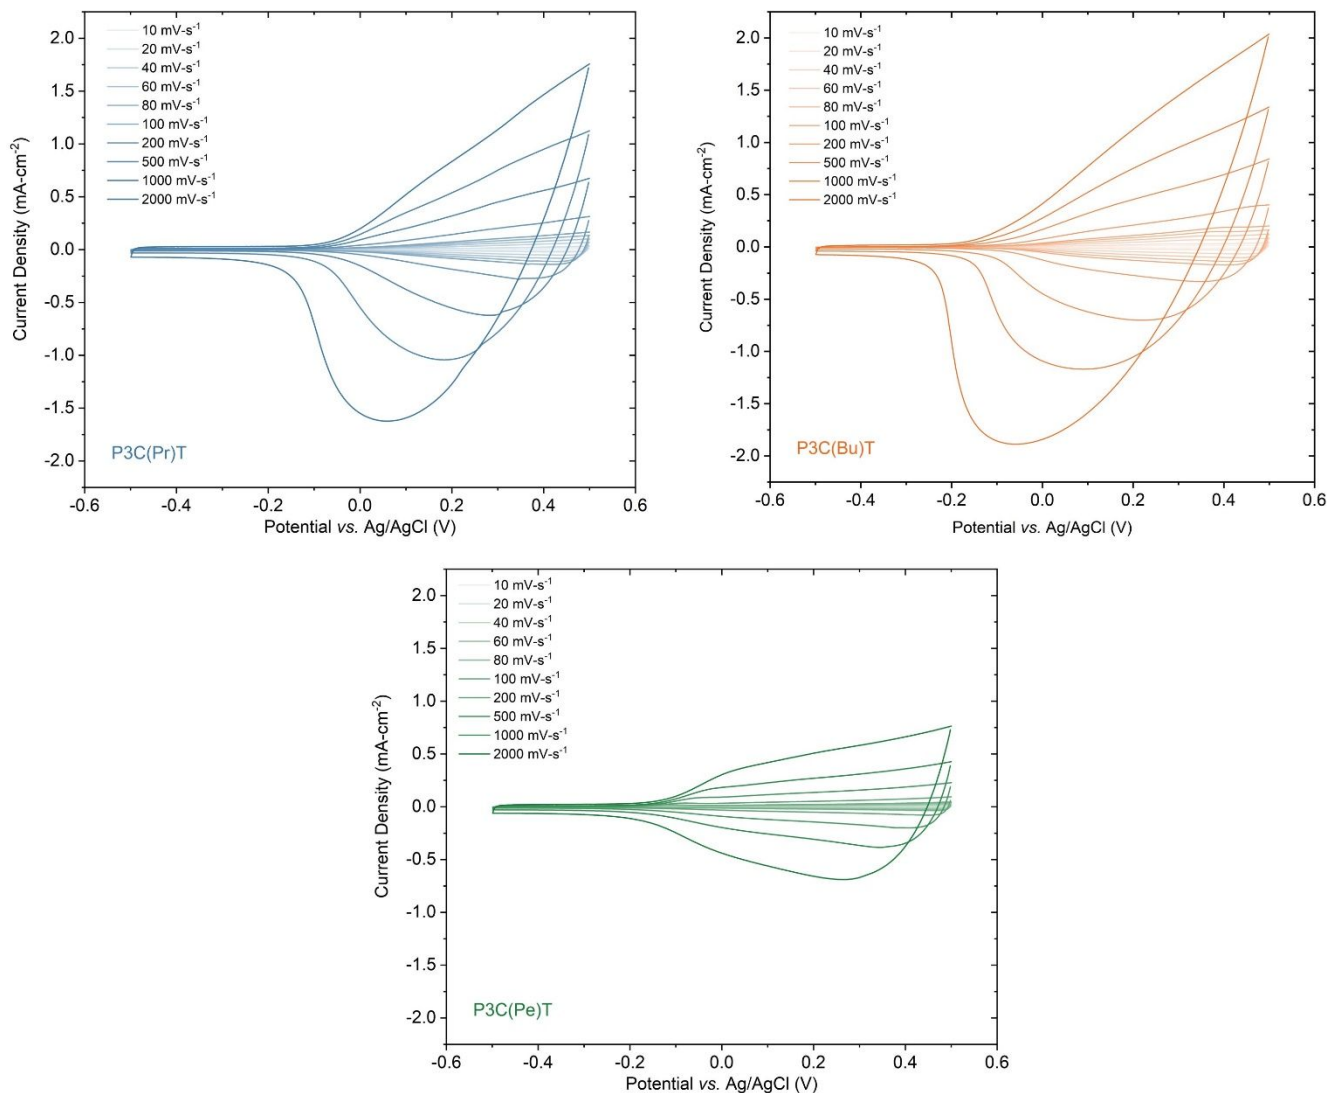

**Figure S3:** Cyclic Voltammograms of P3C(Pr)T (blue), P3C(Bu)T (orange), and P3C(Pe)T (green) taken at increasing scan rates from 10 – 2000 mV/s in 0.1 NaCl (aq).

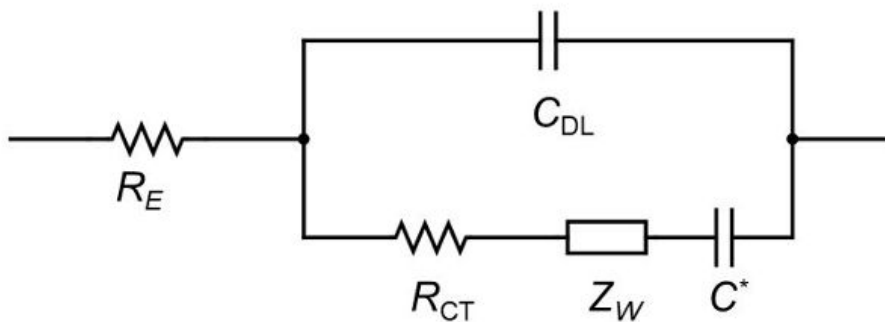

**Figure S4:** Schematic of the diffusion-modified Randles circuit

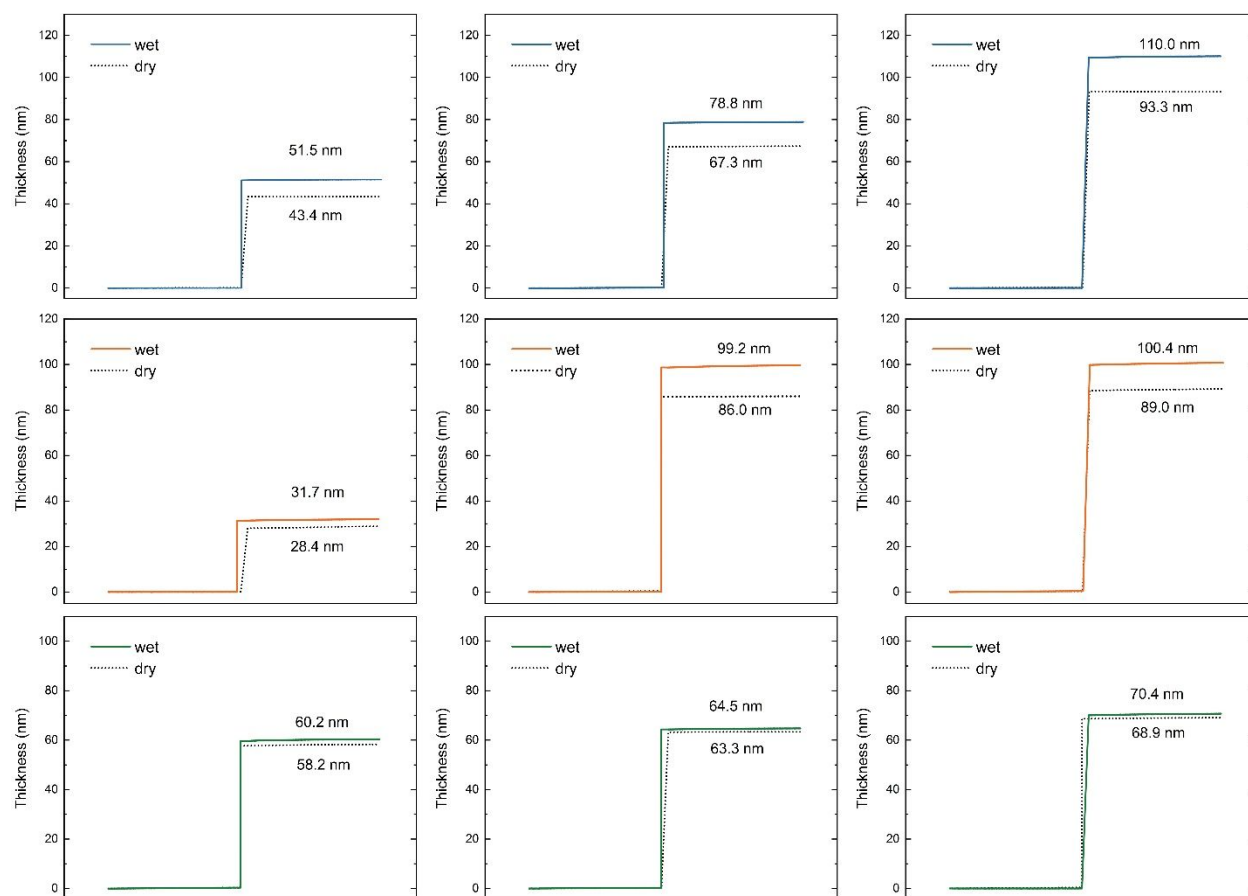

**Figure S5.** Sauerbrey-derived thickness from the 7<sup>th</sup> harmonic of the QCM-D for P3C(Pr)T (blue), P3C(Bu)T (orange), and P3C(Pe)T (green) in the wet and dry state.

**Table S2:** Dry and wet thicknesses as well as averaged swelling percentage calculated using the Sauerbrey equation for P3CATs thin film in 0.1 M NaCl solution.

| Polymers | Dry Thickness [nm] | Wet Thickness [nm]  | Average Swelling Percentage [%] |
|----------|--------------------|---------------------|---------------------------------|
| P3C(Pr)T | 43.4 / 67.3 / 93.3 | 51.5 / 78.8 / 110.0 | 17.9                            |
| P3C(Bu)T | 28.4 / 86.0 / 89.0 | 31.7 / 99.2 / 100.4 | 12.3                            |
| P3C(Pe)T | 58.2 / 63.3 / 68.9 | 60.2 / 64.5 / 70.4  | 2.5                             |

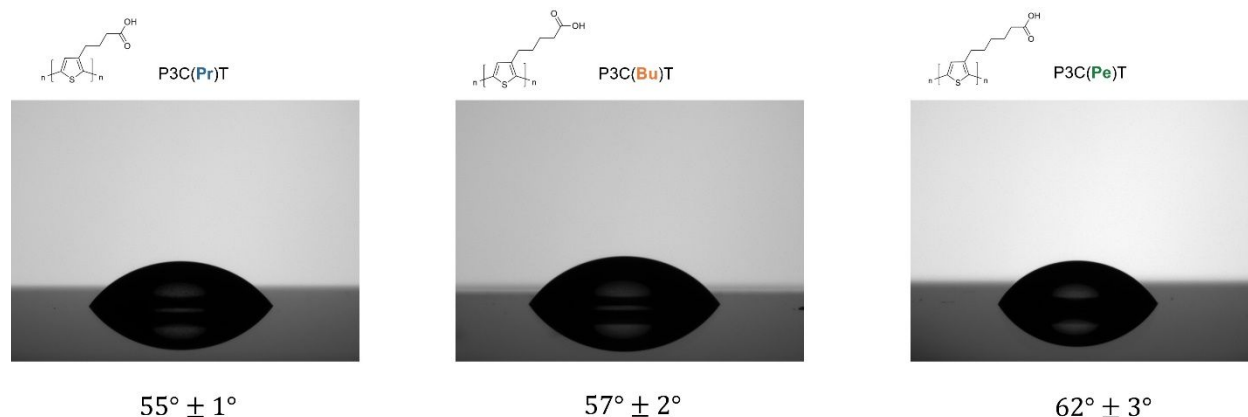

**Figure S6.** Water contact angle measurement of thin films for P3C(Pr)T (blue), P3C(Bu)T (orange), and P3C(Pe)T (green) average from five samples.

**Table S3:** Summary of passive swelling of organic mixed conductors in different solvents/electrolyte.

| Polymers                                               | Solvent/Electrolyte        | Passive Swelling [%] |
|--------------------------------------------------------|----------------------------|----------------------|
| <b>P3C(Pr)T (this work)</b>                            | <b>H<sub>2</sub>O/NaCl</b> | <b>17.9%</b>         |
| <b>P3C(Bu)T (this work)</b>                            | <b>H<sub>2</sub>O/NaCl</b> | <b>12.3%</b>         |
| <b>P3C(Pe)T (this work)</b>                            | <b>H<sub>2</sub>O/NaCl</b> | <b>2.5%</b>          |
| P3HHT <sup>1</sup>                                     | H <sub>2</sub> O/KCl       | 2.4%                 |
| PEDOT:PSS <sup>2</sup>                                 | H <sub>2</sub> O/NaCl      | 86%                  |
| p(g2T-TT) <sup>3</sup>                                 | H <sub>2</sub> O/NaCl      | 10%                  |
| p(p2T-TT) <sup>4</sup>                                 | H <sub>2</sub> O/NaCl      | 5%                   |
| p(b2T-TT) <sup>4</sup>                                 | H <sub>2</sub> O/NaCl      | 13%                  |
| p(gNDI-gT2) <sup>5</sup>                               | H <sub>2</sub> O/NaCl      | 44%                  |
| p(C3-gNDI-gT2) <sup>5</sup>                            | H <sub>2</sub> O/NaCl      | 28%                  |
| p(C6-gNDI-gT2) <sup>5</sup>                            | H <sub>2</sub> O/NaCl      | 13%                  |
| PTHS-TMA+ <sup>-</sup> -co-P3HT 51:49 mol <sup>6</sup> | H <sub>2</sub> O/NaCl      | 22%                  |
| PTHS-TMA+ <sup>-</sup> -co-P3HT 23:77 mol <sup>6</sup> | H <sub>2</sub> O/NaCl      | 4%                   |
| p(g3T2) <sup>7</sup>                                   | H <sub>2</sub> O/NaCl      | 50%                  |

If not otherwise specified, swelling measurement was conducted through QCM-D. **P3HHT** is a polythiophenes with hexyl-hydroxyl side chain. **PEDOT:PSS** is poly(3,4-ethylenedioxythiophene):polystyrene sulfonate. **p(g2T-TT)** is poly(2-(3,3-bis(2-(2-(2-methoxyethoxy)ethoxy)ethoxy)-[2,20-bithiophen]-5-yl)thieno[3,2-b]thiophene). **p(p2T-TT)** and **p(b2T-TT)** are the derivatives by replacing the ethylene glycol side chain on p(g2T-TT) with propylene glycol (PG) and butylene glycol (BG), respectively. **p(gNDI-gT2)** is a copolymer comprising glycolated naphthalene-tetracarboxylic diimide-bithiophene (gNDI-T2) units bearing with ethylene glycol side chain, and **p(C3-gNDI-gT2)** and **p(C6-gNDI-gT2)** are derivatives featuring either a propyl or a hexyl glycol chains on NDI-T2 backbone. **PTHS** is a polythiophene with hexanesulfonate side chain, **PTHS-TMA+** is PTHS that has a cation-exchanged tetramethylammonium group. **PTHS-TMA+<sup>-</sup>-co-P3HT** is a gradient copolymer consisting of PTHS and poly(3-hexylthiophene) (P3HT). **p(g3T2)** is poly[3,3'-bis(2-(2-(2-methoxyethoxy)ethoxy)ethoxy)-2,2'-bithiophene].

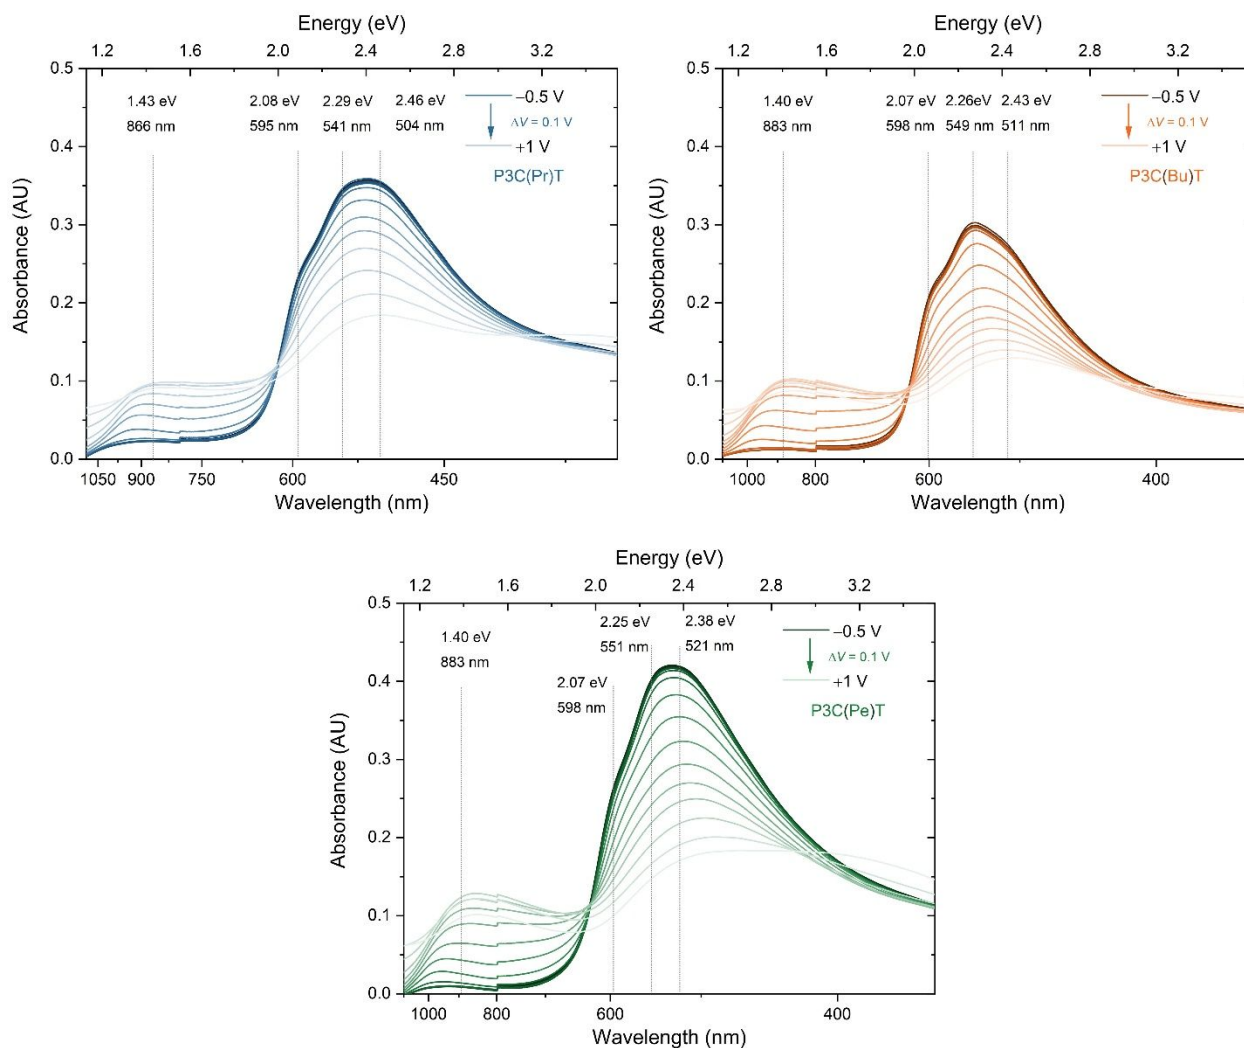

**Figure S7:** Non-normalized voltage-dependent UV-Vis-NIR steady state spectra of P3C(Pr)T (blue), P3C(Bu)T (orange), and P3C(Pe)T (green) from -0.5 V (dark) to 1 V (light) vs. Ag/AgCl in 0.1 M NaCl (aq) in 0.1 V increments of as-cast film on ITO/glass.

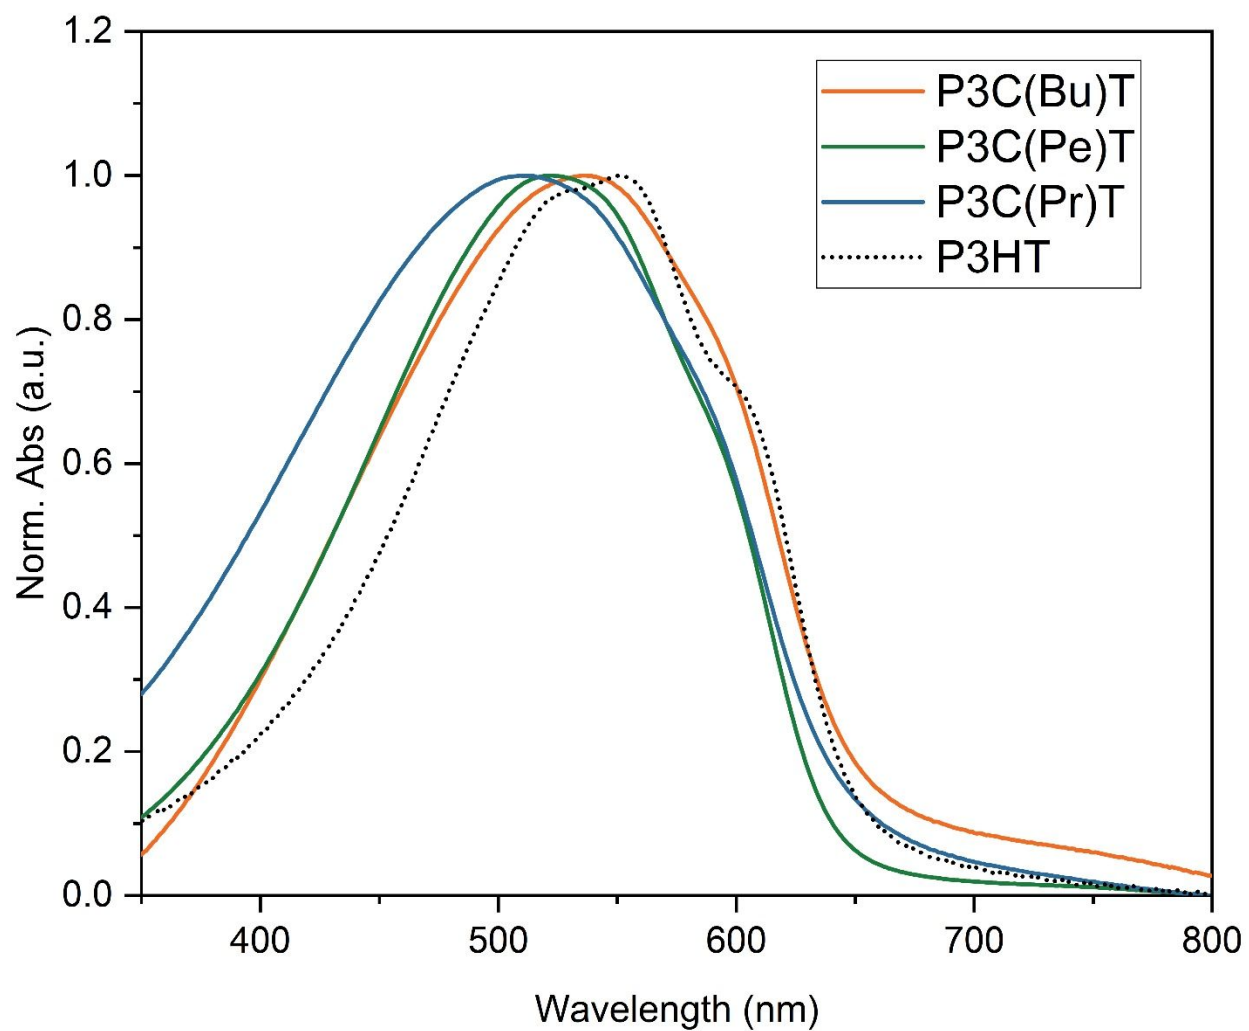

**Figure S8:** Comparison of steady-state UV-Vis of pristine films in ambient condition for P3HT (dot), P3C(Pr)T (blue), P3C(Bu)T (orange), and P3C(Pe)T (green)



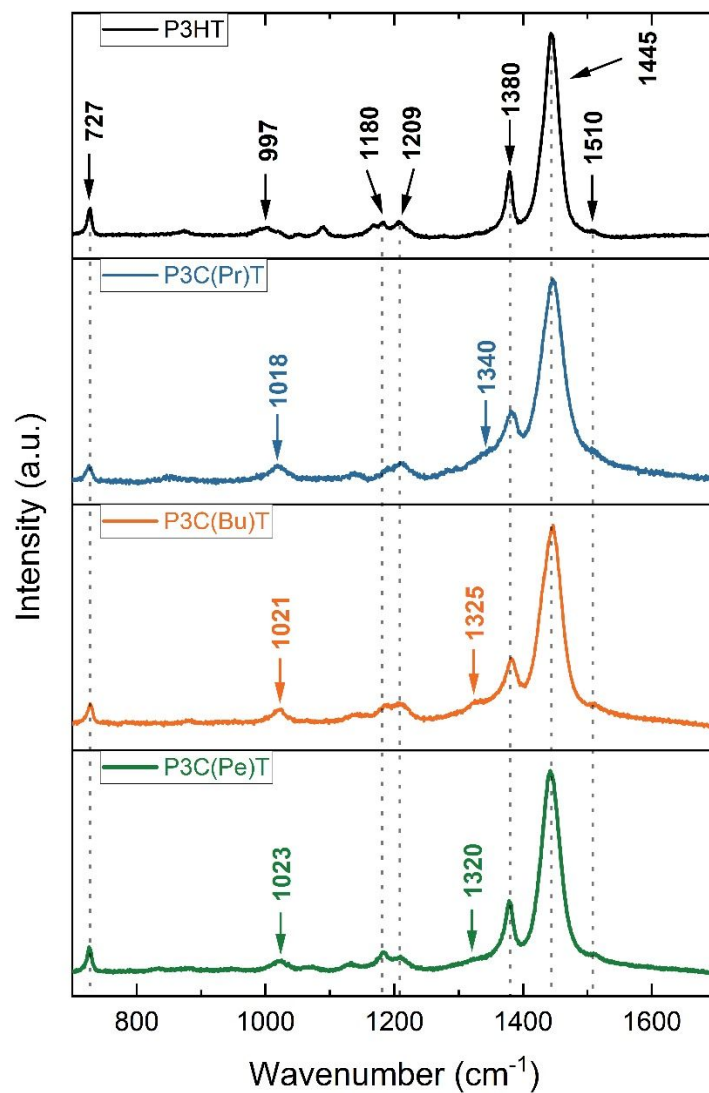

**Figure S9:** *ex situ* Raman spectra under 633 nm excitation wavelength for P3HT (black), P3C(Pr)T (blue), P3C(Bu)T (orange), and P3C(Pe)T (green) in air.

**Table S4:** Summary of P3HT and P3CATs Raman Peak assignment under 633 nm.

| Mode # | P3HT<br>Peak position (cm <sup>-1</sup> ) | P3CATs<br>Peak position (cm <sup>-1</sup> ) | P3HT Literatures<br>positions (cm <sup>-1</sup> ) <sup>8</sup> | Mode Assignment                            |
|--------|-------------------------------------------|---------------------------------------------|----------------------------------------------------------------|--------------------------------------------|
| 1      | 1510                                      | 1510                                        | 1512                                                           | Antisymmetric C=C stretching               |
| 2      | 1445                                      | 1445                                        | 1443                                                           | Symmetric C=C stretching                   |
| 3      | 1380                                      | 1380                                        | 1378                                                           | Intra-ring C-C stretching                  |
| 4      | 1209                                      | 1209                                        | 1208                                                           | Inter-ring C-C stretching                  |
| 5      | 1180                                      | 1180                                        | 1186                                                           | C-H bending with Inter-ring C-C stretching |
| 6      | 997                                       | 1018/1021/1023                              | 1021                                                           | C-C alkyl stretching                       |
| 7      | 727                                       | 727                                         | 728                                                            | C-S-C deformation                          |

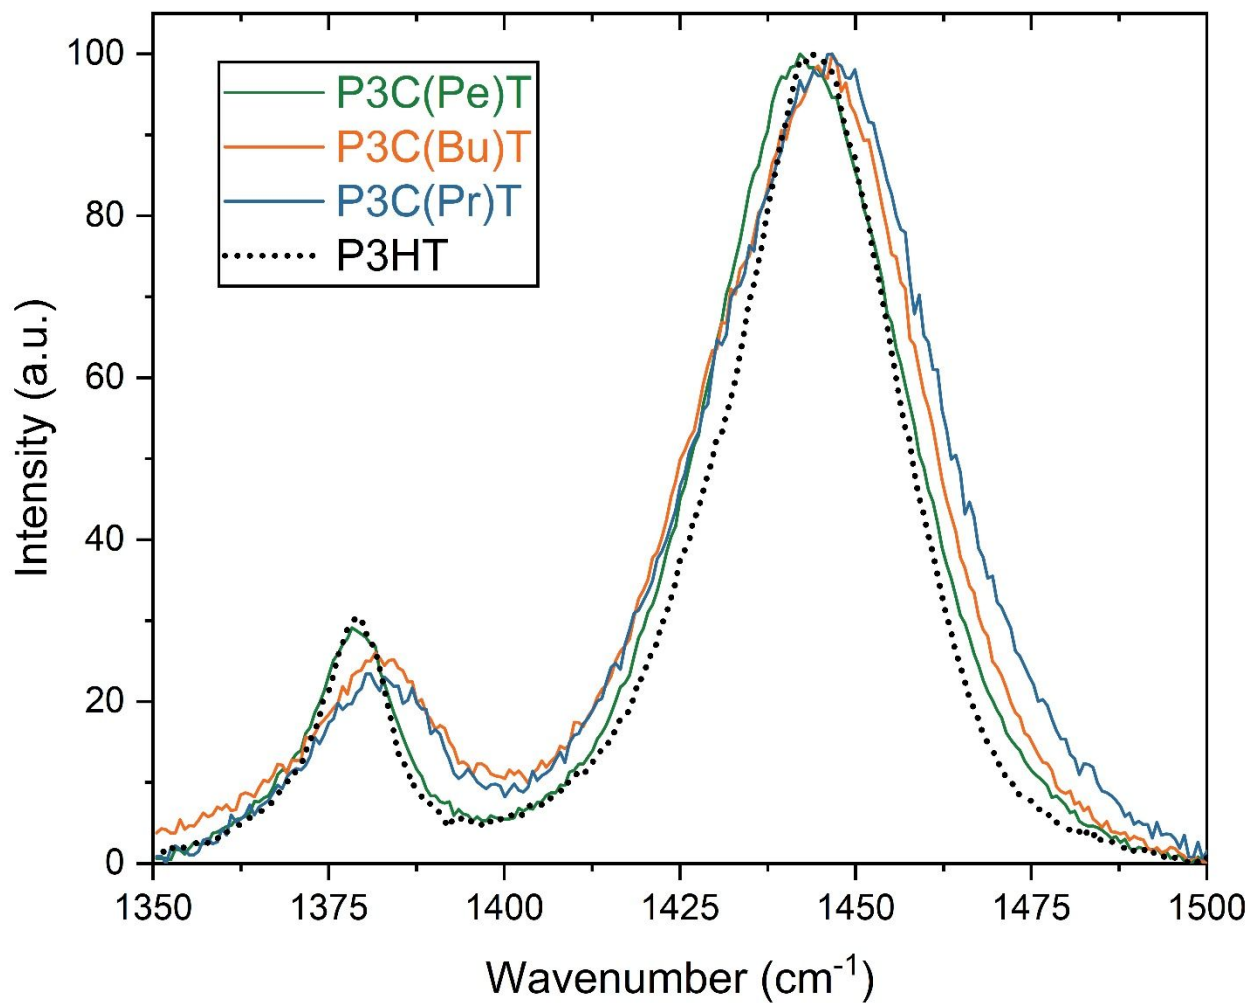

**Figure S10:** Comparison of *ex situ* Raman spectra of pristine films under 633 nm excitation wavelength between 1350 to 1500 cm<sup>-1</sup> in ambient condition for P3HT (dot), P3C(Pr)T (blue), P3C(Bu)T (orange), and P3C(Pe)T (green).

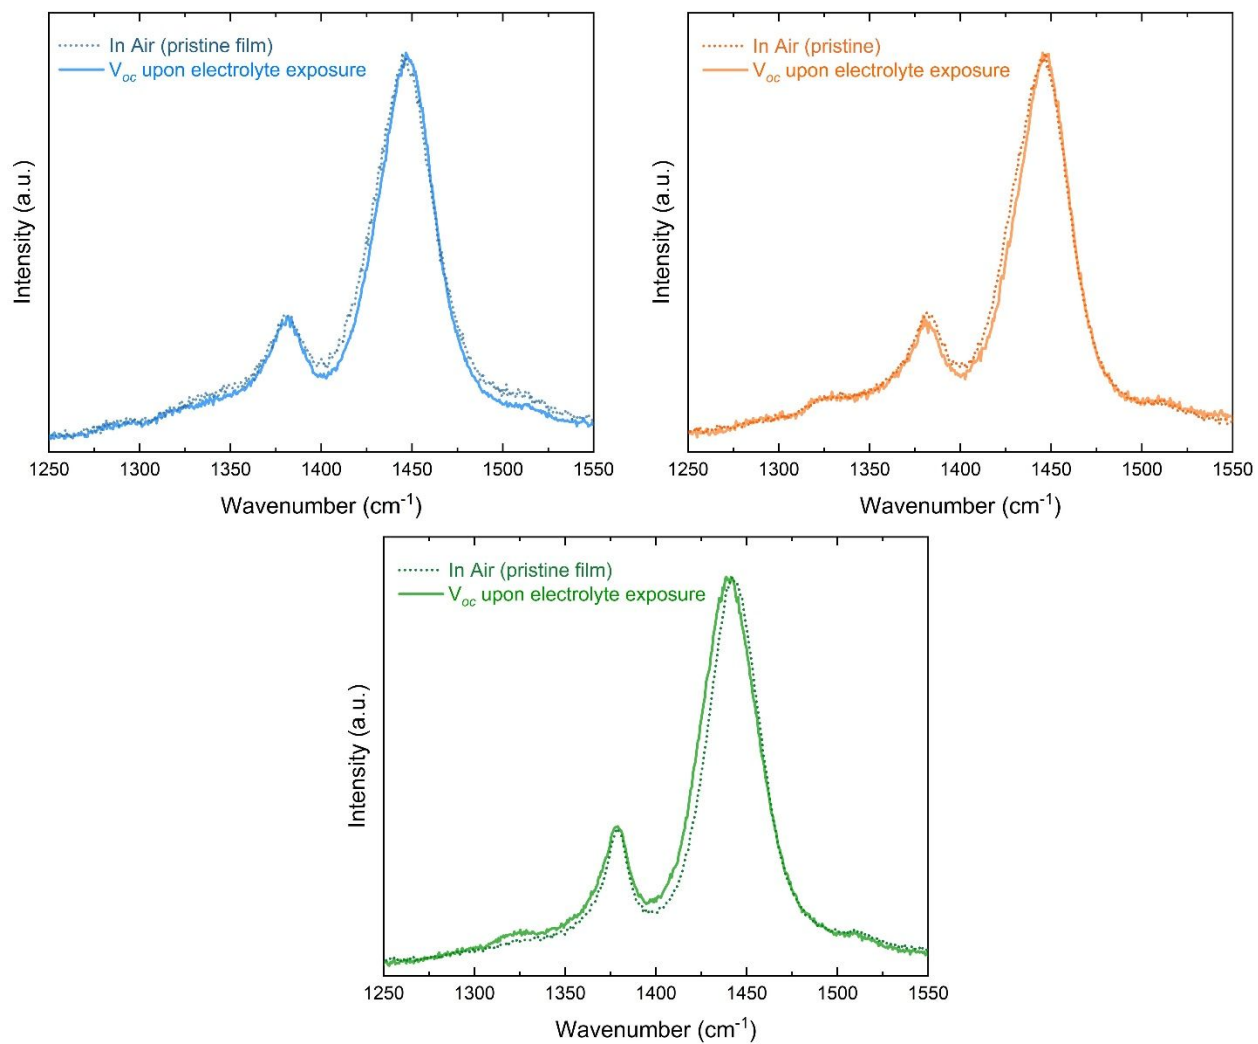

**Figure S11:** *ex situ* Raman spectra for each polymer, P3C(Pr)T (blue), P3C(Bu)T (orange), and P3C(Pe)T (green) in air condition compared with immediately exposing to electrolyte.

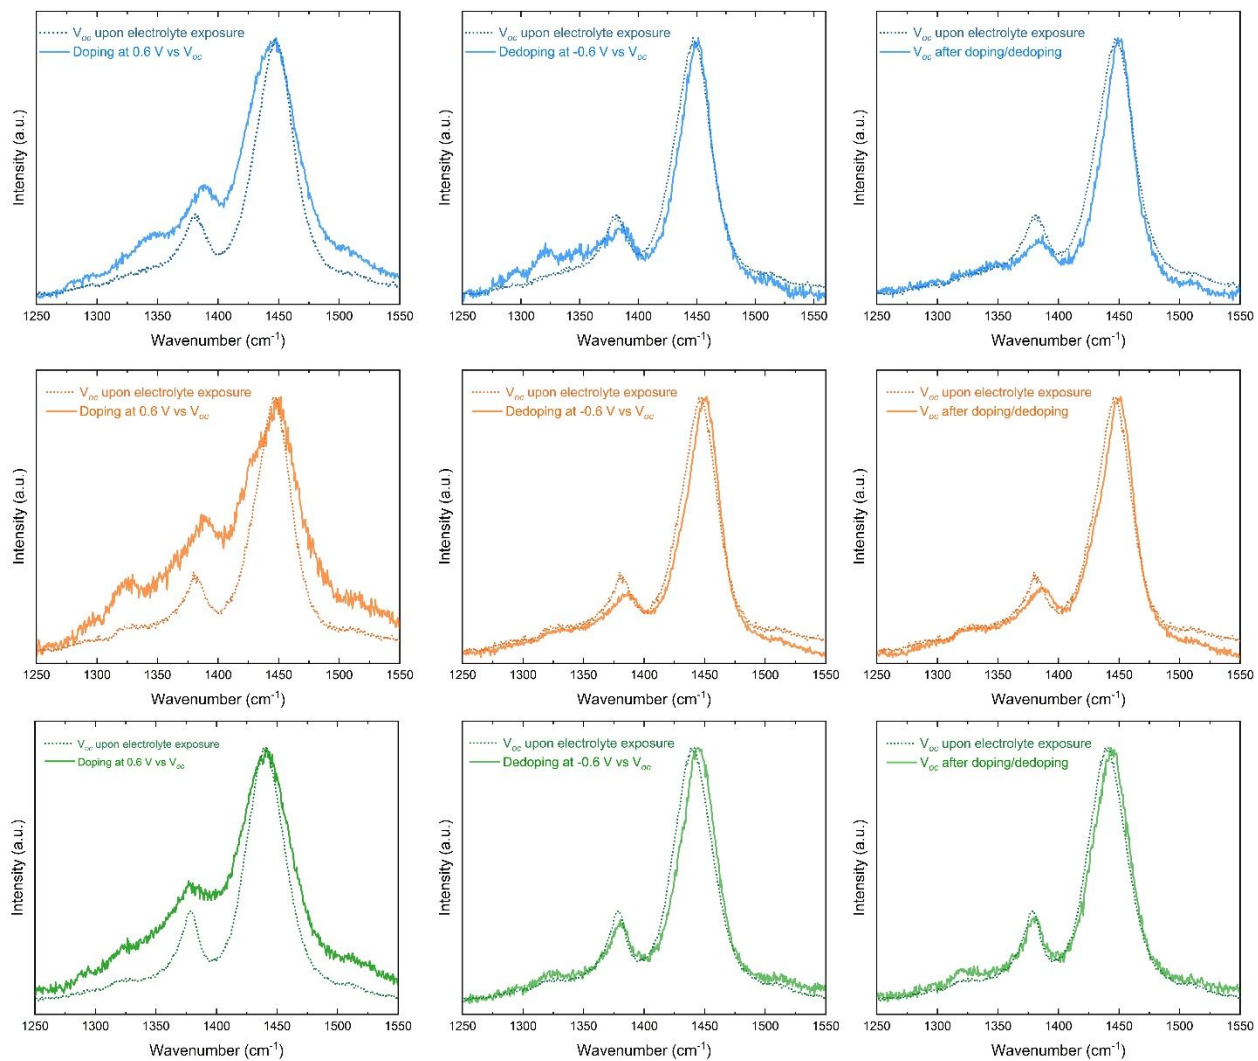

**Figure S12:** *in situ* Raman spectra comparison with initial  $V_{oc}$  for each polymer at doping, dedoping and  $V_{oc}$  state after doping/dedoping cycles.

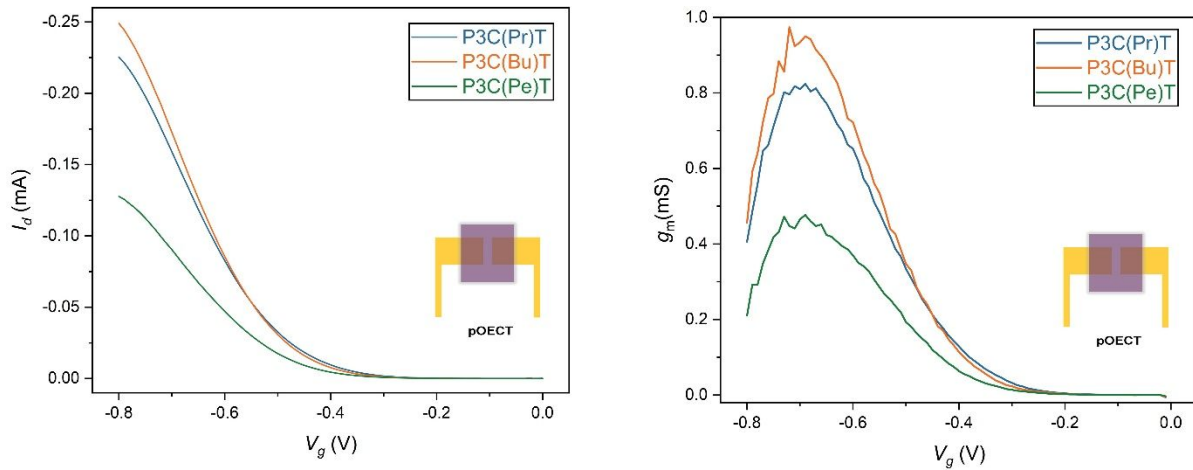

**Figure S13.** Example of pOECT characteristics ( $W = 100 \mu\text{m}$ ,  $L = 50 \mu\text{m}$ ) for P3C(Pr)T (138 nm, blue), P3C(Bu)T (100 nm, orange), and P3C(Pe)T (140 nm, green). From left to right, Transfer curve ( $V_d = -0.6$  V) showing drain current varied with gate and transconductance curve.

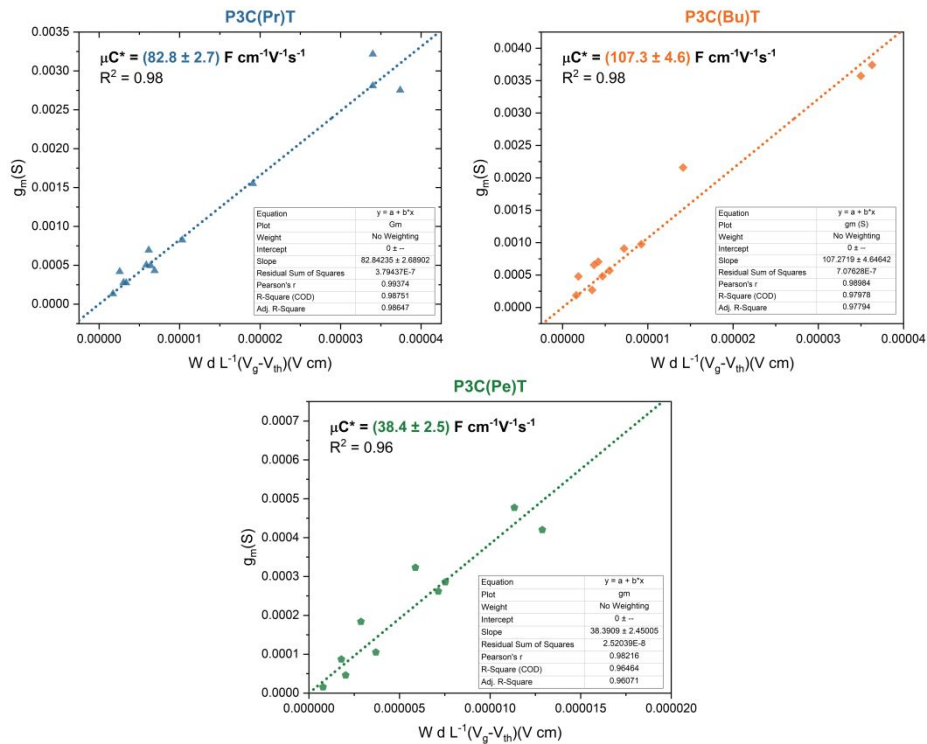

**Figure S14:** Transconductance values as a function of channel geometry in a linear scale for P3C(Pr)T (blue), P3C(Bu)T (orange), and P3C(Pe)T (green) from left to right. Dashed lines are the linear fits  $y = ax$ , and  $\mu\text{C}^*$  values are extracted from the slope of the linear fit.

**Table S5:** Summary of figure-of-merit parameters for conjugated polyelectrolytes. For interdigitated iOECT comparison, all interdigitated electrodes used in this work have a channel length  $L = 10 \mu\text{m}$ , and total width:  $W = 90$  (finger number)  $\times$   $2.75 \text{ mm}$  (finger width)  $= 247.5 \text{ mm}$

| Polymers                                                  | Electrolyte                 | $\mu C^*$<br>[F cm <sup>-1</sup> V <sup>-1</sup> s <sup>-1</sup> ] | $C^*$<br>[F cm <sup>-3</sup> ] | $g_{m, \text{iOECT}}$<br>[mS] | $d_{\text{iOECT}}$<br>[nm] | $[Wd/L]_{\text{iOECTs}}$<br>[mm] |
|-----------------------------------------------------------|-----------------------------|--------------------------------------------------------------------|--------------------------------|-------------------------------|----------------------------|----------------------------------|
| <b>P3C(Pr)T</b>                                           | 0.1 M H <sub>2</sub> O/NaCl | <b>83 ± 3</b>                                                      | <b>145 ± 18</b>                | <b>158</b>                    | <b>100</b>                 | <b>2.5</b>                       |
| <b>P3C(Bu)T</b>                                           | 0.1 M H <sub>2</sub> O/NaCl | <b>107 ± 4</b>                                                     | <b>111 ± 14</b>                | <b>159</b>                    | <b>89</b>                  | <b>2.2</b>                       |
| <b>P3C(Pe)T</b>                                           | 0.1 M H <sub>2</sub> O/NaCl | <b>38 ± 3</b>                                                      | <b>30 ± 5</b>                  | <b>149</b>                    | <b>95</b>                  | <b>2.4</b>                       |
| PTHS + EG <sup>9</sup>                                    | 0.1 M H <sub>2</sub> O/NaCl | 5.5 ± 0.1                                                          | 124                            | -                             | -                          | -                                |
| PTHS-TMA+-co-P3HT<br>70:30 mol <sup>6</sup>               | 0.1 M H <sub>2</sub> O/NaCl | 0.97                                                               | 107 ± 6                        | -                             | -                          | -                                |
| PTHS-TMA+-co-P3HT<br>51:49 mol <sup>6</sup>               | 0.1 M H <sub>2</sub> O/NaCl | 1.7                                                                | 100 ± 7                        | -                             | -                          | -                                |
| CPE-K <sup>10</sup>                                       | 0.1 M H <sub>2</sub> O/NaCl | ~5                                                                 | 134                            | 24.72 ± 6.9<br>/62.26 ± 6.2   | 300/2500                   | 10/84                            |
| PEDOT-S: (Oct) <sub>2</sub> NH <sub>2</sub> <sup>11</sup> | 1 M H <sub>2</sub> O/KCl    | -                                                                  | -                              | 8.3 ± 2.1                     | 720                        | 0.058                            |
| PEDOT-S: (Nonyl)NH <sub>3</sub> <sup>11</sup>             | 1 M H <sub>2</sub> O/KCl    | -                                                                  | -                              | 6.4 ± 0.7                     | 1110                       | 0.062                            |

**Ethylene glycol (EG)** is an additive utilized to improve electronic conductivity typically in PEDOT based and polythiophene based polymer. **CPE-K** is poly [2,6-(4,4-bis-potassium butanysulfonate-4H-cyclopenta-[2,1-b;3,4-b']-dithiophene)-alt-4,7-(2,1,3-benzothiadiazole)]. **PEDOT-S** is poly(4-(2,3-dihydrothieno-(1,4)dioxin-2-yl-methoxy)-1-butanefulfonic acid), and **PEDOT-S: (Oct)<sub>2</sub>NH<sub>2</sub>** and **PEDOT-S: (Nonyl)NH<sub>3</sub>** is PEDOT-S with a cation-exchanged dioctylammonium group, (Oct)<sub>2</sub>NH<sub>2</sub>, and nonylammonium group, (Nonyl)NH<sub>3</sub> group, respectively.

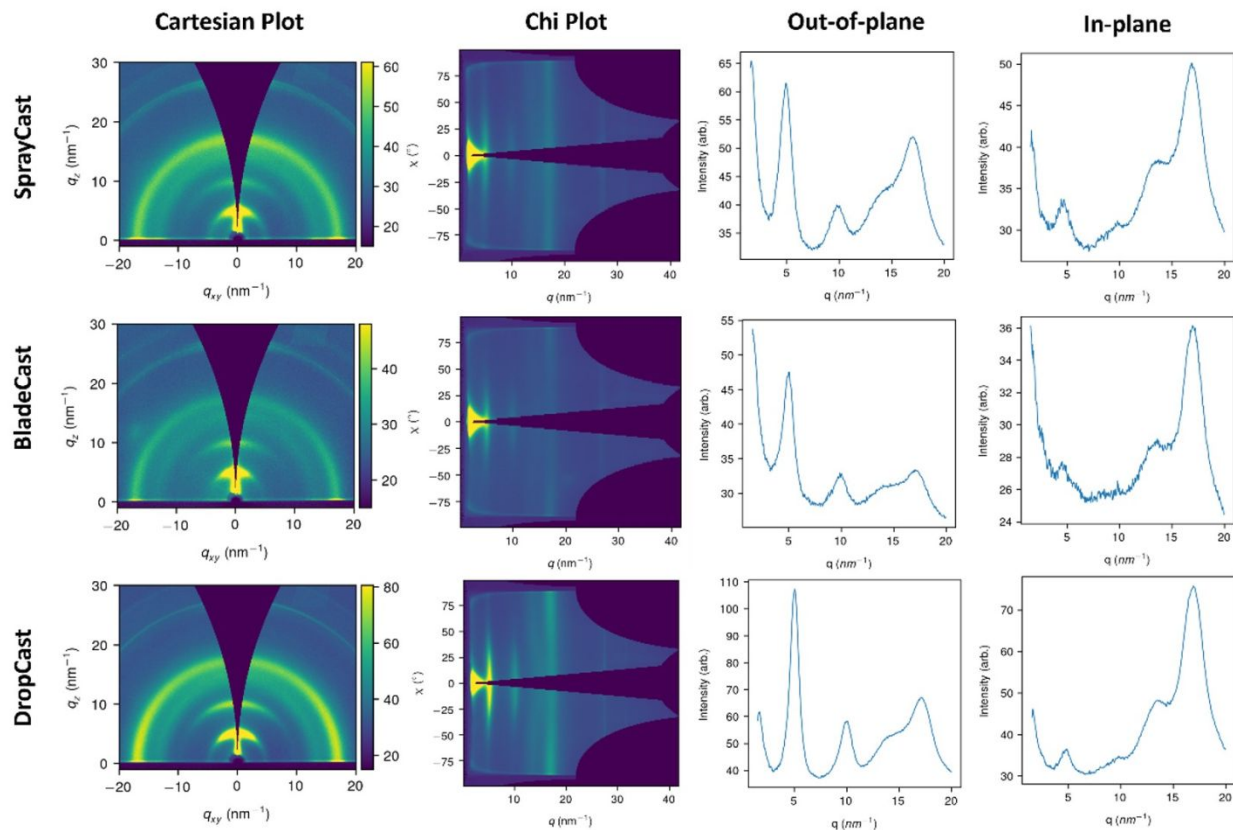

**Figure S15:** Cartesian and Chi-plots of the GIWAXS spectra for P3C(Pr)T in three cast techniques. These results demonstrate that processing potentially plays a minor role in dictating the as-cast microstructure of the polymer. P3C(Pr)T has a lamellar spacing (100) of 1.25 nm and a  $\pi$ -spacing (010) of 0.37 nm.

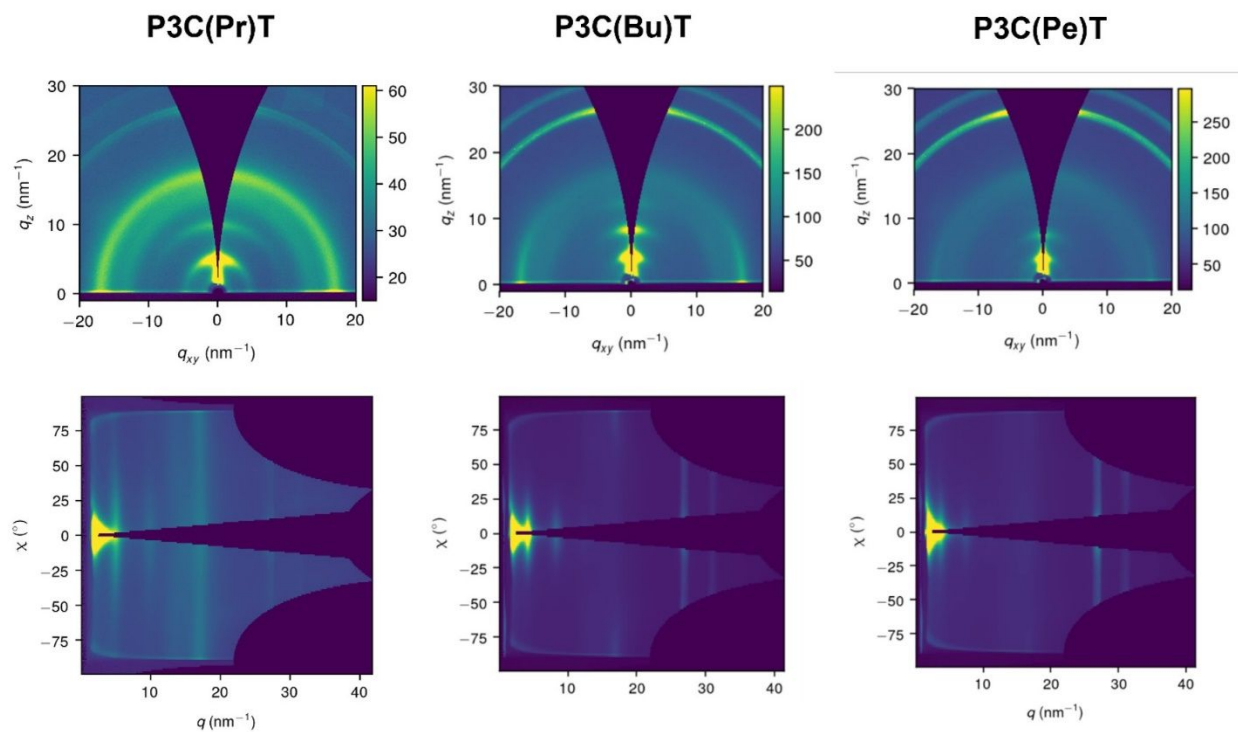

**Figure S16:** Cartesian and Chi-plots of the GIWAXS spectra for P3CATs though spray coating. P3C(Bu)T has a lamellar spacing (100) of 1.53 nm and P3C(Pe)T has a lamellar spacing (100) of 1.61 nm. Raw signal of  $\pi$ -spacing for Bu and Pe analogues is dim to perform further analysis. However, they appear to be around 0.372 nm, similar to P3C(Pr)T. These spectra provide clear evidence demonstrating the trend of expansion of the lamellar spacing as alkyl length increases.



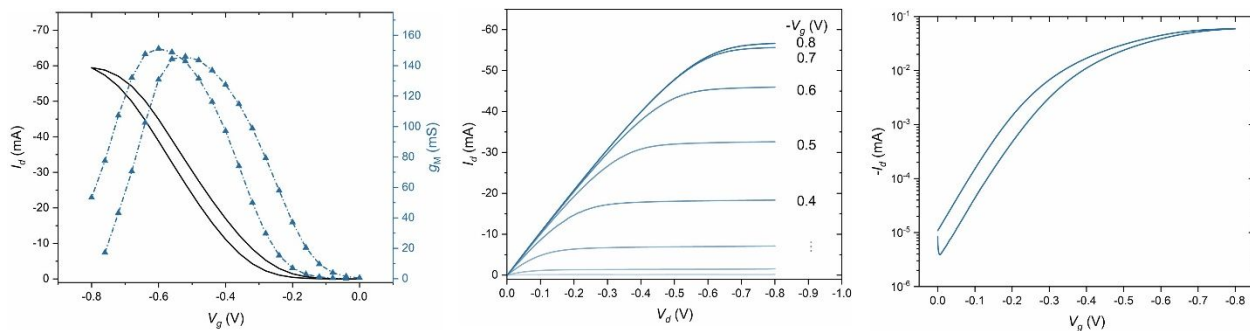

**Figure S17:** iOECT characteristics for P3C(Pr)T. From left to right, Transfer curve ( $V_D = -0.6$  V) showing drain current varied with gate voltages (black line) and transconductance (dashed blue line). Output curve for various gate voltages; and transfer curve on logarithmic scale.

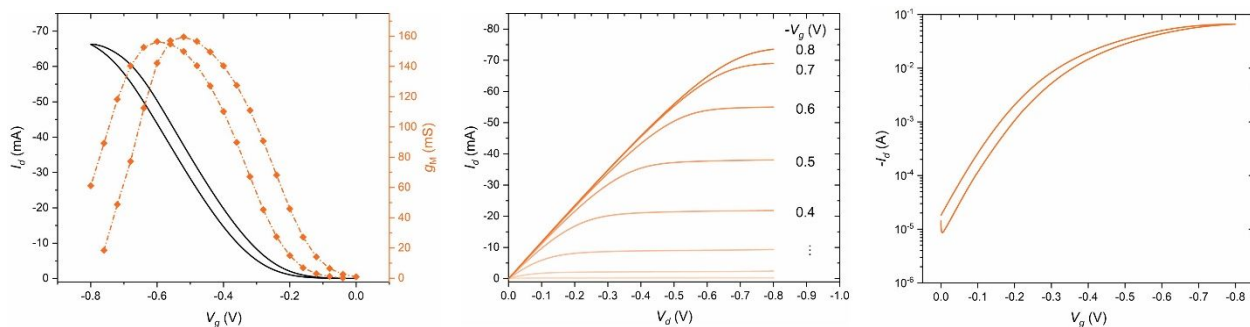

**Figure S18:** iOECT characteristics for P3C(Bu)T. From left to right, Transfer curve ( $V_D = -0.6$  V) showing drain current varied with gate voltages (black line) and transconductance (dashed blue line). Output curve for various gate voltages; and transfer curve on logarithmic scale.

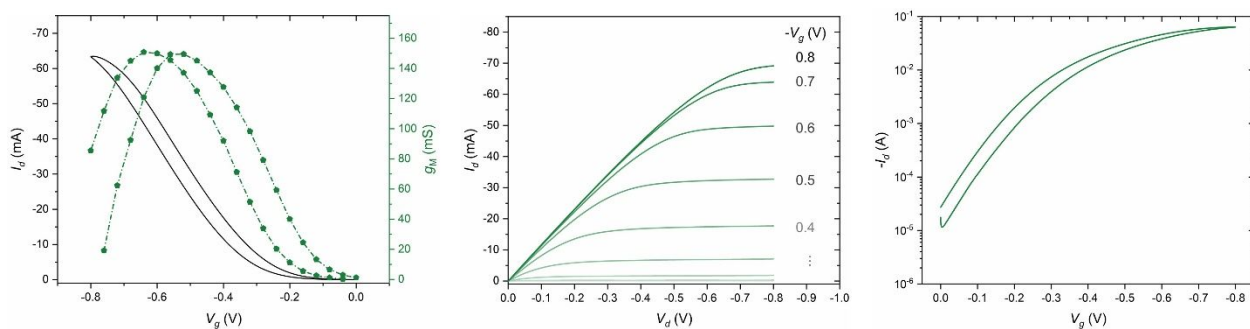

**Figure S19:** iOECT characteristics for P3C(Pe)T. From left to right, Transfer curve ( $V_D = -0.6$  V) showing drain current varied with gate voltages (black line) and transconductance (dashed blue line). Output curve for various gate voltages; and transfer curve on logarithmic scale.

## References

- (1) Nicolini, T.; Surgailis, J.; Savva, A.; Scaccabarozzi, A. D.; Nakar, R.; Thuau, D.; Wantz, G.; Richter, L. J.; Dautel, O.; Hadziioannou, G.; Stingelin, N. A Low-Swelling Polymeric Mixed Conductor Operating in Aqueous Electrolytes. *Advanced Materials* **2021**, *33* (2), 2005723. <https://doi.org/10.1002/adma.202005723>.
- (2) Savva, A.; Wustoni, S.; Inal, S. Ionic-to-Electronic Coupling Efficiency in PEDOT:PSS Films Operated in Aqueous Electrolytes. *J Mater Chem C Mater* **2018**, *6* (44), 12023–12030. <https://doi.org/10.1039/C8TC02195C>.
- (3) Savva, A.; Cendra, C.; Giugni, A.; Torre, B.; Surgailis, J.; Ohayon, D.; Giovannitti, A.; McCulloch, I.; Di Fabrizio, E.; Salleo, A.; Rivnay, J.; Inal, S. Influence of Water on the Performance of Organic Electrochemical Transistors. *Chemistry of Materials* **2019**, *31* (3), 927–937. <https://doi.org/10.1021/acs.chemmater.8b04335>.
- (4) Moser, M.; Wang, Y.; Hidalgo, T. C.; Liao, H.; Yu, Y.; Chen, J.; Duan, J.; Moruzzi, F.; Griggs, S.; Marks, A.; Gasparini, N.; Wadsworth, A.; Inal, S.; McCulloch, I.; Yue, W. Propylene and Butylene Glycol: New Alternatives to Ethylene Glycol in Conjugated Polymers for Bioelectronic Applications. *Mater Horiz* **2022**, *9* (3), 973–980. <https://doi.org/10.1039/D1MH01889B>.
- (5) Maria, I. P.; Paulsen, B. D.; Savva, A.; Ohayon, D.; Wu, R.; Hallani, R.; Basu, A.; Du, W.; Anthopoulos, T. D.; Inal, S.; Rivnay, J.; McCulloch, I.; Giovannitti, A. The Effect of Alkyl Spacers on the Mixed Ionic-Electronic Conduction Properties of N-Type Polymers. *Adv Funct Mater* **2021**, *31* (14), 2008718. <https://doi.org/10.1002/adfm.202008718>.
- (6) Schmode, P.; Ohayon, D.; Reichstein, P. M.; Savva, A.; Inal, S.; Thelakkat, M. High-Performance Organic Electrochemical Transistors Based on Conjugated Polyelectrolyte Copolymers. *Chemistry of Materials* **2019**, *31* (14), 5286–5295. <https://doi.org/10.1021/acs.chemmater.9b01722>.
- (7) Moser, M.; Hidalgo, T. C.; Surgailis, J.; Gladisch, J.; Ghosh, S.; Sheelamanthula, R.; Thiburce, Q.; Giovannitti, A.; Salleo, A.; Gasparini, N.; Wadsworth, A.; Zozoulenko, I.; Berggren, M.; Stavrinidou, E.; Inal, S.; McCulloch, I. Side Chain Redistribution as a Strategy to Boost Organic Electrochemical Transistor Performance and Stability. *Advanced Materials* **2020**, *32* (37), 2002748. <https://doi.org/10.1002/adma.202002748>.
- (8) Tsoi, W. C.; James, D. T.; Kim, J. S.; Nicholson, P. G.; Murphy, C. E.; Bradley, D. D. C.; Nelson, J.; Kim, J. S. The Nature of In-Plane Skeleton Raman Modes of P3HT and Their Correlation to the Degree of Molecular Order in P3HT:PCBM Blend Thin Films. *J Am Chem Soc* **2011**, *133* (25), 9834–9843. <https://doi.org/10.1021/JA2013104>.
- (9) Inal, S.; Malliaras, G. G.; Rivnay, J. Benchmarking Organic Mixed Conductors for Transistors. *Nat Commun* **2017**, *8* (1), 1767. <https://doi.org/10.1038/s41467-017-01812-w>.
- (10) Lill, A. T.; Cao, D. X.; Schrock, M.; Vollbrecht, J.; Huang, J.; Nguyen-Dang, T.; Brus, V. V.; Yurash, B.; Leifert, D.; Bazan, G. C.; Nguyen, T. Organic Electrochemical Transistors Based on the Conjugated

Polyelectrolyte PCPDTBT-SO<sub>3</sub> K (CPE-K). *Advanced Materials* **2020**, 32 (33), 1908120. <https://doi.org/10.1002/adma.201908120>.

- (11) Zeglio, E.; Eriksson, J.; Gabrielsson, R.; Solin, N.; Inganäs, O. Highly Stable Conjugated Polyelectrolytes for Water-Based Hybrid Mode Electrochemical Transistors. *Advanced Materials* **2017**, 29 (19), 1605787. <https://doi.org/10.1002/adma.201605787>.
